# Supplementary material for: Direct use of gaseous and air-derived CO2 for amino acid biosynthesis in an ATP and NAD(P)H-free chemoenzymatic system
Source: Research Square preprint supplement (doi:10.21203/rs.3.rs-2255242/v1), 2022-12-08
Supplement: Supplementary file 1 [file 4739ee070dc40de808f52af2.docx]

**Supplementary information**

**Direct use of gaseous and air-derived CO2 for amino acid biosynthesis in** **an ATP and NAD(P)H-free chemoenzymatic system**

Jianming Liu1,2, Han Zhang1,2, Anping Zeng1*

1 Center of Synthetic Biology and Integrated Bioengineering, School of Engineering, Westlake University. 600 Dunyu Road, Xihu District, Hangzhou 310024, Zhejiang Province, China

2 Contributed equally to this work

Corresponding author:

Anping Zeng

zenganping@westlake.edu.cn

**Methods**

**Native PAGE**

The rGCS proteins, including H, T, P, L proteins and their variants or mixtures were mixed with 5×Native-PAGE protein loading buffer (Real-Times Biotechnology Co., Ltd., Beijing, PL111) and loaded into wells of 15% separating gels configurated for low molecular weight proteins (Real-Times Biotechnology Co., Ltd., Beijing, RTD6130). Samples were electrophoresed by soaking in 1×Tris-Gly buffer at 150V for 60 min. Following electrophoresis, the gel was stained with Coomassie blue 250 and decolorized with 30% methanol and 10% acetic acid. The concentrations of each protein in Native PAGE gel: M, Protein marker; P, 4.3 mM P protein; P+DTT, 4.3 mM P protein + 50 mM DTT; T, 10.8 mM T protein; T+DTT, 10.8 mM T protein + 50 mM DTT; PT, 4.3 mM P protein + 10.8 mM T protein; PT+DTT, 4.3 mM P protein + 10.8 mM T protein + 50 mM DTT; C335S, 4.3 mM; C949S, 4.3 mM; C951S, 4.3 mM.

**Molecular dynamics simulations**

We performed the molecular dynamics simulations using the Amber20 package with the Amber14 force field. The parameters including charges (AM1-bcc) and atom types for the lipoamide were generated using Antechamber provided in Ambertools21. PyMOL was used for visualization. For each simulation, the system with 1.0 nm of padding was filled with TIP3P water molecules and neutralized with Na+ counter ions. Each system was minimized using the steepest descent of 5000 steps and conjugate gradient methods of 5000 steps to eliminate any overlap or clash between the atoms. Convergence was reached when the maximum force was not greater than 1000 kJ mol−1 nm−1 at any atom. Then the system was heated up to 300 K using the Langevin dynamics. At this stage, position restraints on the heavy atoms of the protein allowed the surrounding water molecules to relax. When the system temperature was stabilized, the system was equilibrated at a constant pressure of 1 bar using the Berendsen Barostat method. A simulation was run for 2 ns until the density was stable. After that, simulations were performed using an integration time step set to 2.0 fs. All hydrogen-bonds were constrained using the SHAKE algorithm. For each system, 15 independent trajectories for 1 ns starting from random number seeds were simulated. Afterward, clustering analysis was used to choose a “representative” structure. The “representative” structure is the conformation with the smallest average root-mean-square deviation from the centroid of the largest population. Subsequently, we simulated the “representative” structure for the following simulations to obtain the trajectory.

**Electrostatic potential surface calculation for Pox and Pred**

The structure of Pox was simulated using SWISS-MODEL workspace1. The structure of Pred was based on the AlphaFold2 protein structure of P protein from *E. coli* K12 (Uniprot: P33195). The electrostatic potential surface was calculated using APBS3 and visualized in PyMOL.

**Preparation of THF solution**

The stock solution of THF is 10 mM. To prepare 1 ml solution, a suitable amount of THF powder is first dissolved in 30 ml 1 M KOH solution. After it is completely solubilized, 270 ml H2O and 300 ml 0.2 M KH2PO4 are added in the solution, subsequently. Finally 400 ml 1 M DTT is added to prevent its oxidation.


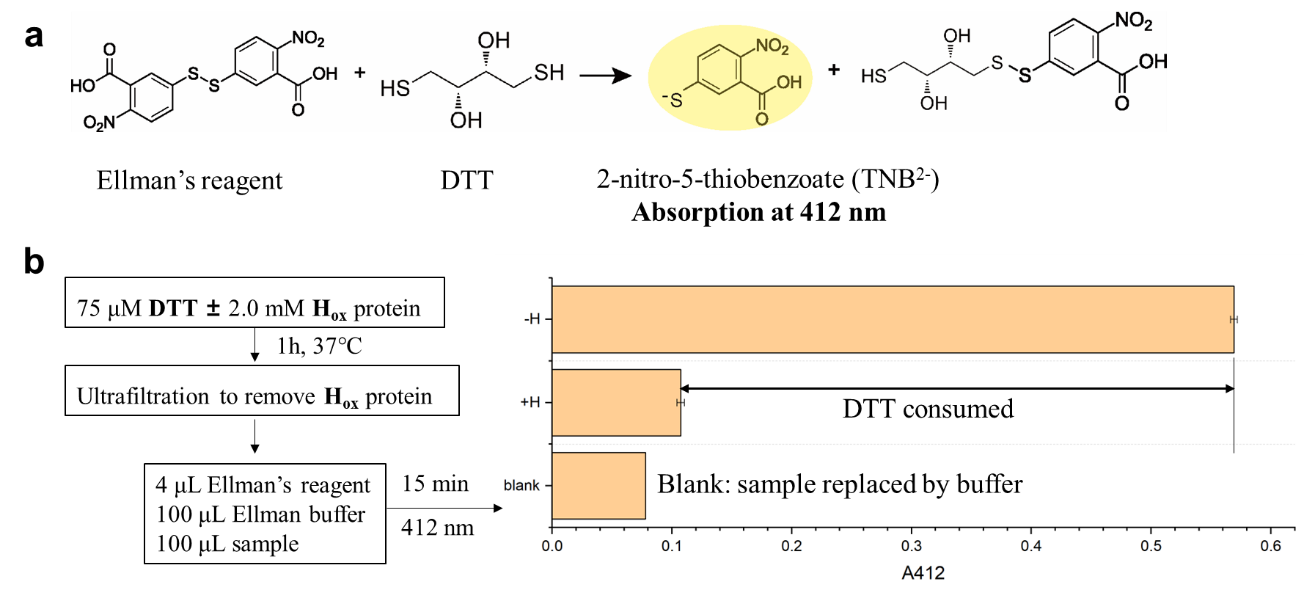


**Fig. 1** Measurement of DTT consumption in the process of electron-transfer to Hox using Ellman’s reagent. **a**, the chemical reaction between DTT and Ellman’s reagent can generate a yellow compound 2-nitro-5-thiobenzoate (TNB2-) that has an absorption at 412 nm. **b**, In the assay, a low concentration of DTT of 75 mM and 2.0 mM Hox were mixed together at 37 oC for 1 h, after that, the mixture was separated using ultrafiltration. The remaining DTT was measured.





**Fig. 2** Quantification of the conversion of Hox to Hred in the presence of DTT using HPLC. Hox was fresh H protein purified from the recombinant *E. coli* BL21 (pET28a-H) cells. To make Hred, 50 μM Hox and 0.1 mM or 1.0 mM DTT were reacted for 5 mins. In the presence of 1.0 mM DTT, 50 μM Hox was completely reduced to Hred in 5 mins and maintained stable in such an environmental condition (2-h and 10-h samples displayed the same in chromatographs).


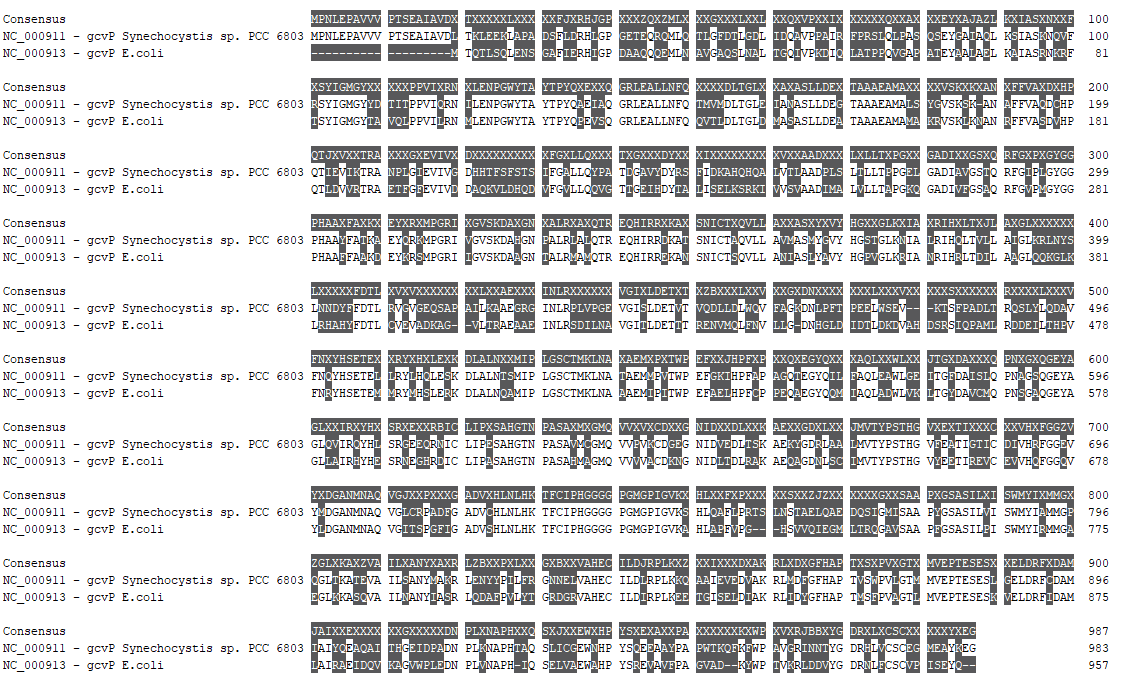


**Fig. 3** P protein (NCBI No. WP_010873139.1) from *Synechocystis* sp. PCC 6803 and P protein (NCBI No. WP_112929453.1) from *Escherichia coli* K-12 MG1655 have a 57.2% similarity in amino acids.


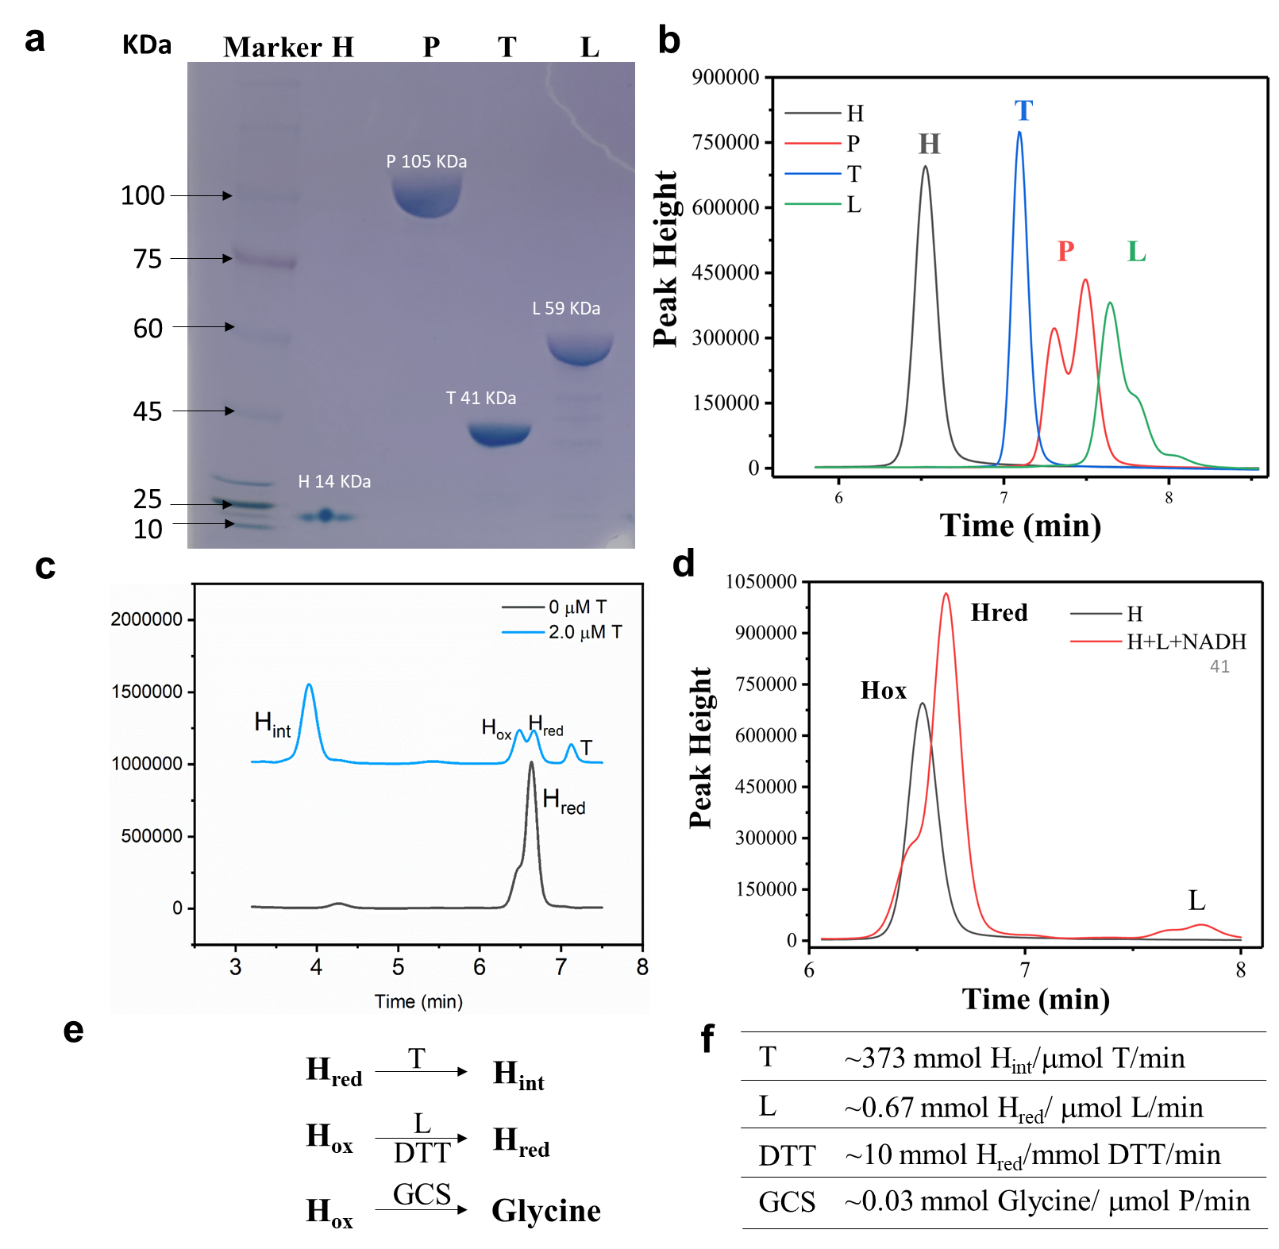


**Fig. 4** Quantitative analysis of the rGCS components and reactions. **a**, SDS-PAGE analysis for purified H, P, T and L proteins. **b**, The rGCS proteins were analyzed based on the HPLC method using a Shimadzu LC-2030C system with a ZORBAX 300SB-C18 column (4.6×250 mm, 5 μM) and monitored at 210 nm using a DAD-3000 diode array detection. **c**, Measurement of the reaction catalyzed by T protein in the absence of DTT. We prepared Hred from 100 mM Hox using 5 mM L protein and 20 mM NADH for 0.5 h. Then 2 mM T protein, 5 mM NH4HCO3, 2 mM HCHO and 0.5 mM THF were added to the system. The formation of Hint was measured after 10 mins, which was used to calculate the T reaction rate. **d**, Hox to Hred with L and NADH. The assay contains 100 mM Hox, 5 mM L protein and 20 mM NADH. **e**, The reactions used to calculate the velocity. **f**, The approximate velocity for each reaction.


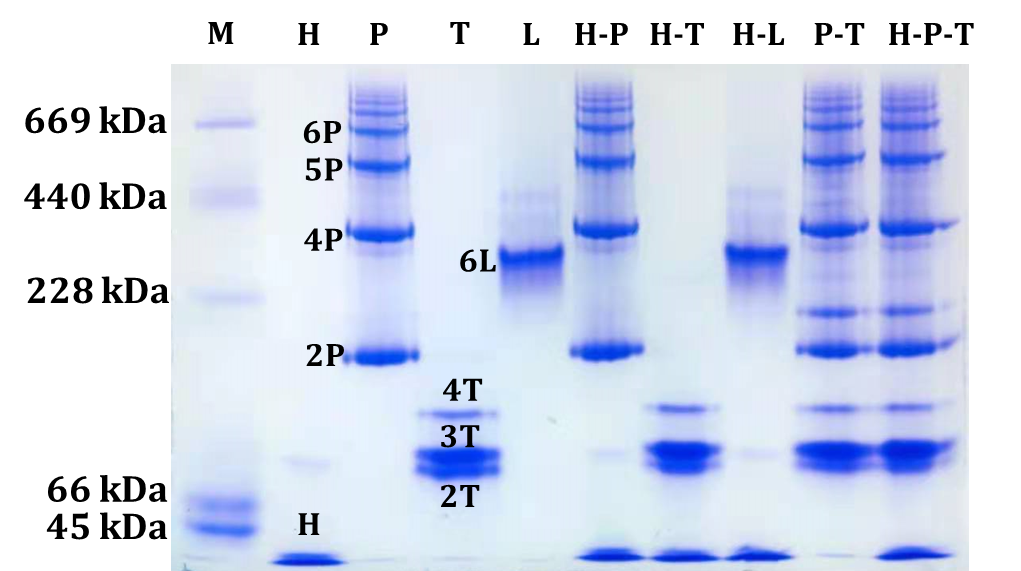


**Fig. 5** Native-PAGE of the rGCS proteins and their mixtures. M, Protein marker; H, 30 mM H protein; P, 4.3 mM P protein; T, 10.8 mM T protein; L, 8.7 mM L protein; H-P, 30 mM H protein + 4.3 mM P protein; H-T, 30 mM H protein + 10.8 mM T protein; H-L, 30 mM H protein + 8.7 mM L protein; P-T, 4.3 mM P protein +10.8 mM T protein; H-P-T, 30 mM H protein + 4.3 mM P protein + 10.8 mM T protein.


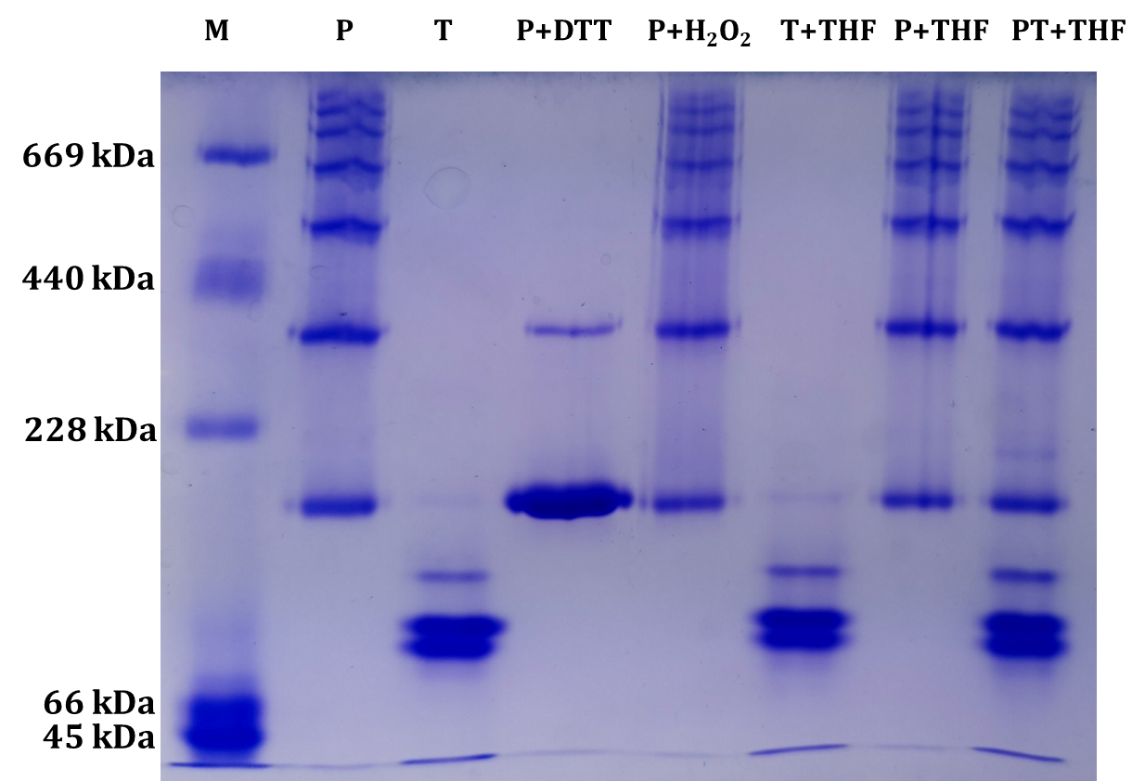


**Fig. 6** Native-PAGE of P, T proteins with DTT, H2O2 and THF. M, Protein marker;P, 4.3 mM P protein; T, 10.8 mM T protein; P+DTT, 4.3 mM P protein + 50 mM DTT; P+H2O2, 4.3 mM P protein + 50 mM H2O2; T+THF, 10.8 mM T protein + 1 mM THF; P+THF, 4.3 mM P protein + 1 mM THF; PT+THF, 4.3 mM P protein +10.8 mM T protein + 1 mM THF.


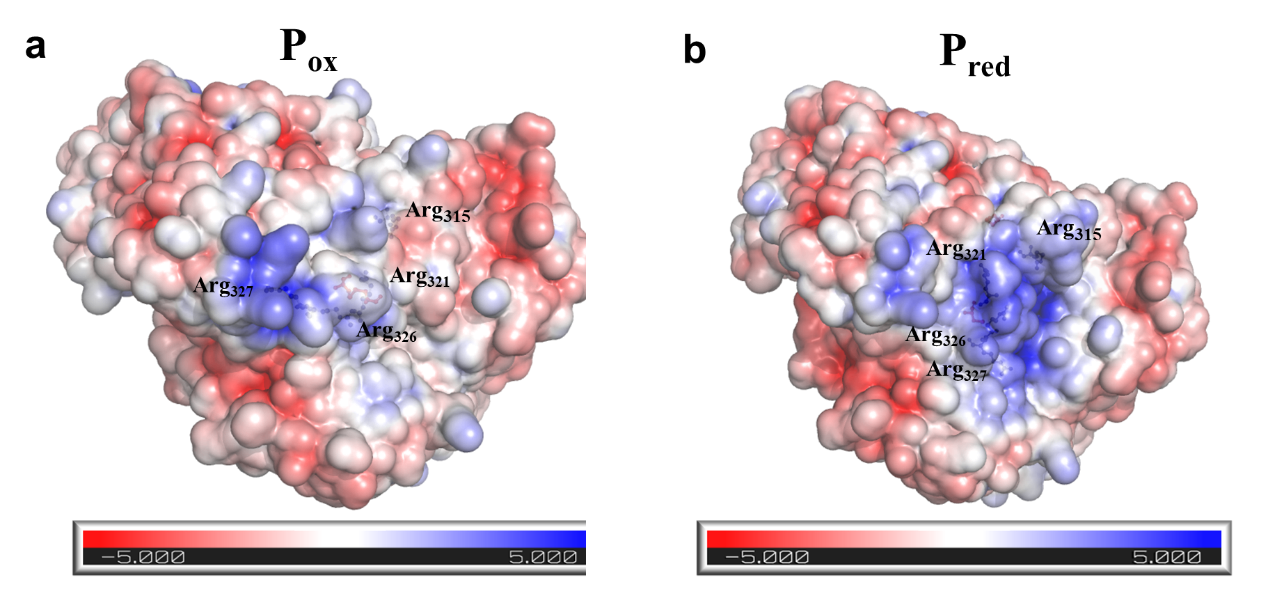


**Fig. 7** Electrostatic surface analysis of the oxidized state (**a**) and reduced state (**b**) of P protein. Electrostatic surfaces are colored blue in the positive region and red in the negative region.


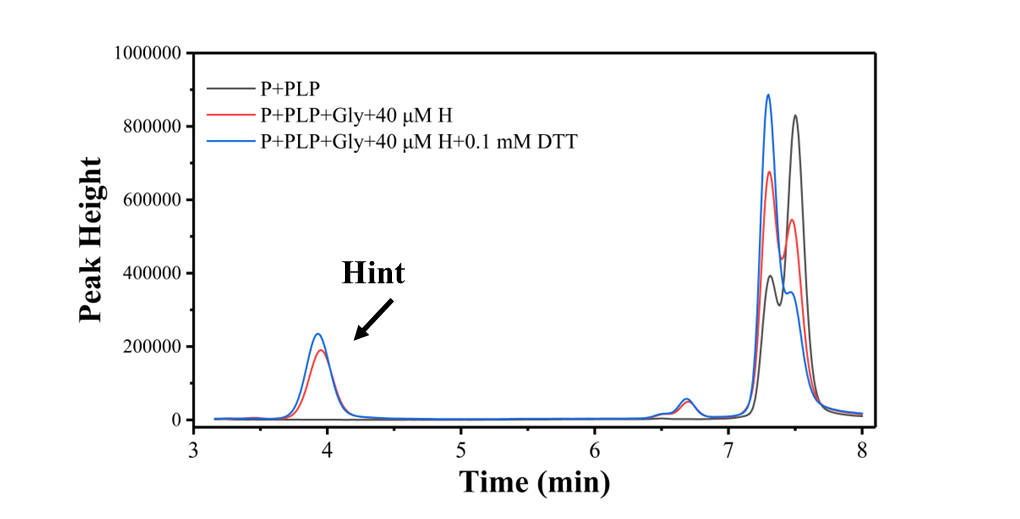


**Fig. 8** DTT accelerated the conversion from the oxidized P state to its reduced state, resulting in an increased production of Hint in the glycine cleavage reaction using glycine as the substrate.





**Fig. 9** Glycine formation rate using a Y70-site saturated mutagenesis library.


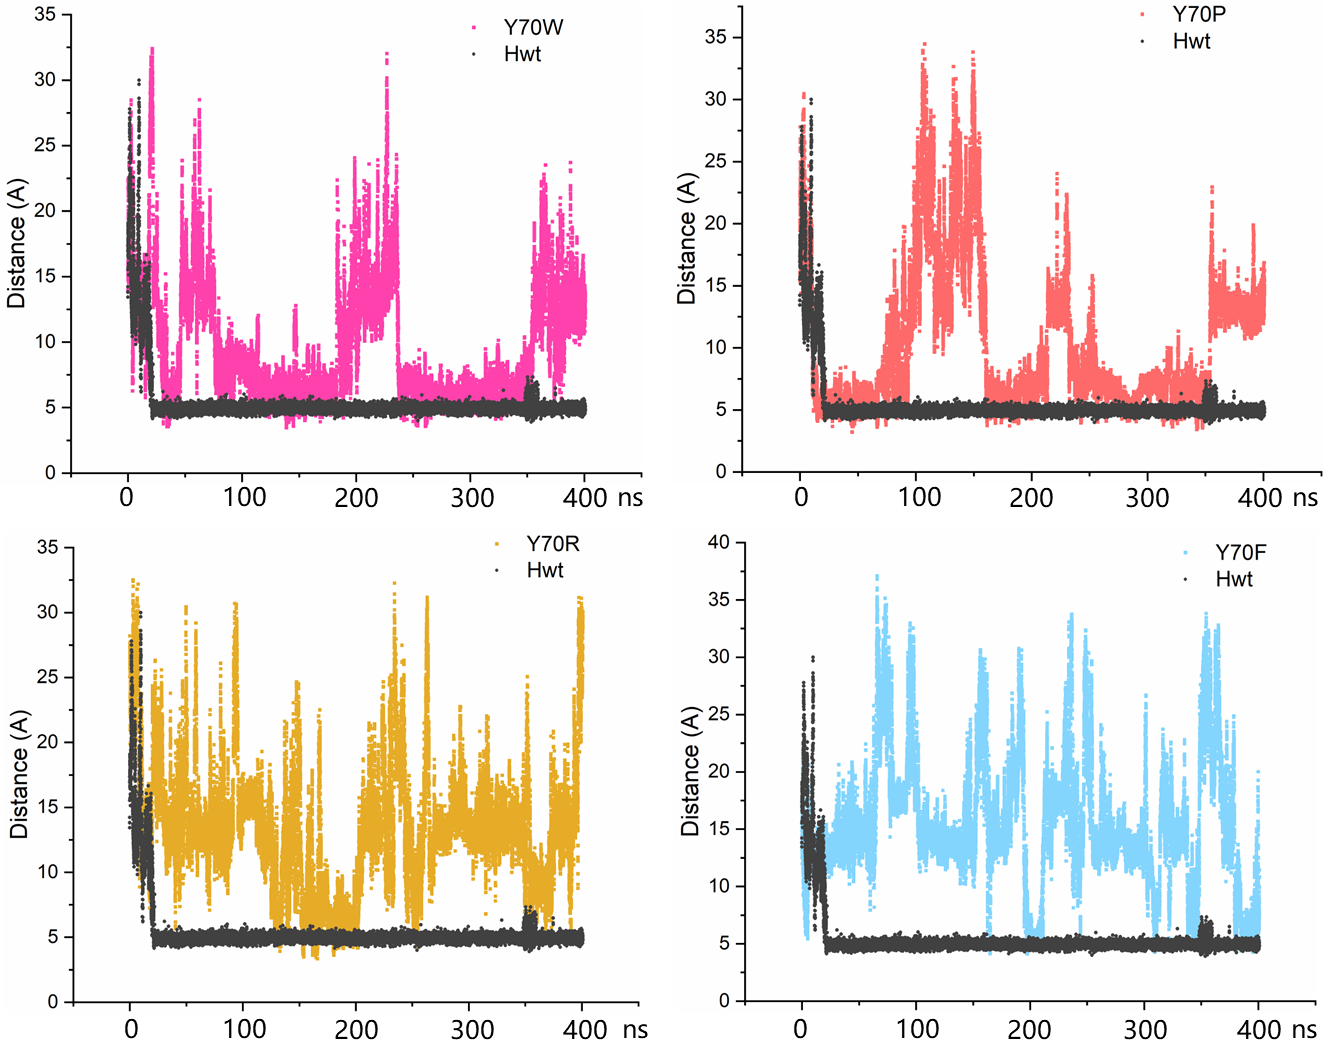


**Fig. 10** Molecular dynamics simulations of Hwt and Y70W, Y70P, Y70R and Y70F. The distance between Ca at E12 of the H protein and the N atom located in the aminomethyl moiety is measured for the first 400 ns in simulations.





**Fig. 11** Effect of formaldehyde concentration and the C/N ratio, refers to HCO3-:NH4+ on glycine production rate.





**Fig. 12** Optimization of DTT concentrations for glycine production. In this experiment, we prepared 10 mM THF as stock solution without adding DTT and the fresh THF was used immediately for the assay including the following components: HM protein, 60 mM; P protein, 5 mM; T protein, 5 mM; HCHO, 20 mM; THF, 0.5 mM; NaHCO3, 50 mM; NH4Cl, 100 mM; PLP, 25 mM.


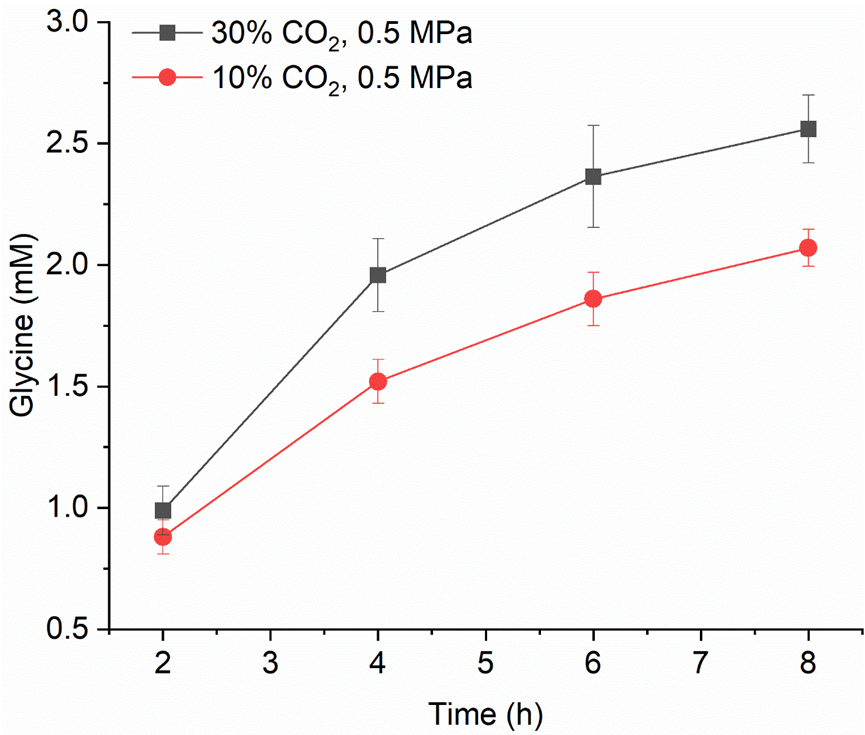


**Fig. 13** Glycine production from gaseous CO2 (10% CO2 with 90% air, 30% CO2 with 70% air) under 0.5 MPa. The rGCS solution without bicarbonate was mixed in a parallel 50 ml pressure reactor (WATTCAS, China) to a final volume of 10 ml. The reaction was started by the introduction of gaseous CO2.

**Fig. 14** Conversion of methanol to formaldehyde using different concentrations of alcohol oxidase from *Pichia pastoris* (AOX , Sigma A2404) and catalase from bovine (Yuanye Bio-Technology, Shanghai). The assay containing 20 mM methanol and 40 mM MOPS buffer (pH 7.5), was performed at 37oC.





**Fig. 15** Transformation of glycine to serine using different concentrations of SHMT. The reactions were carried out in the presence of 10 mM glycine, 10 mM formaldehyde, 0.5 mM THF, pH 7.5 MOPS buffer.


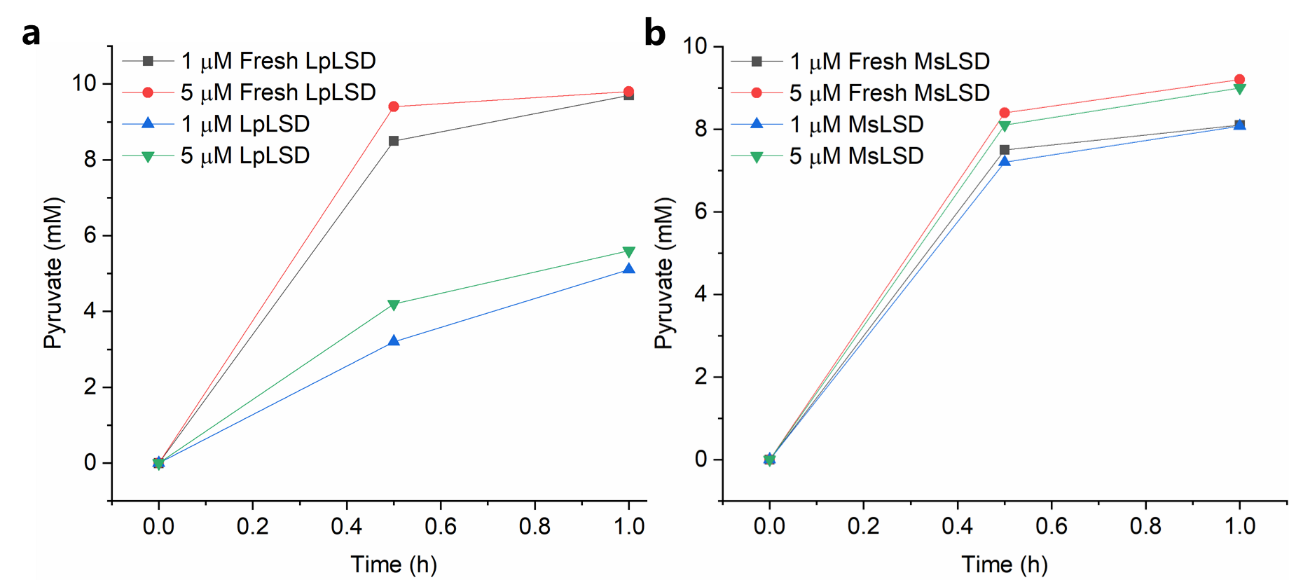


**Fig. 16** Transformation of serine to pyruvate using different concentrations of LpLSD or MsLSD. Fresh means fresh proteins purified from the recombinant *E. coli* BL21 cells and its immediate use in the enzymatic assay, while the control refers to proteins after 1 week storage in -80 freezer. The reactions were carried out in the presence of 10 mM serine and pH 7.5 MOPS buffer.

Table 1 Strains and plasmids used in this study

|  | **Description** | **Reference** |
| --- | --- | --- |
| ***E. coli* Strains** |  | |
| DH5a | Host for cloning plasmids | WEIDI Ltd. |
| BL21 (DE3) | Host for protein overexpression and purification | WEIDI Ltd. |
| **Plasmids** |  | |
| pET28a (+) | Plasmid for protein overexpression | Novagen |
| pET22b (+) | Plasmid for protein overexpression | Novagen |
| pET28a-P | pET28a vector containing P-protein gene (NCBI No. WP_112929453.1) | This study |
| pET28a-P-C335S | pET28a vector containing P-protein gene with point mutation of C335S | This study |
| pET28a-P-C949S | pET28a vector containing P-protein gene with point mutation of C949S | This study |
| pET28a-P-C951S | pET28a vector containing P-protein gene with point mutation of C951S | This study |
| pET28a-P-C949S, C951S | pET28a vector containing P-protein gene with point mutations of C949S and C951S | This study |
| pET28a-T | pET28a vector containing T-protein gene (NCBI No. WP_099356926.1) | This study |
| pET28a-L | pET28a vector containing L-protein gene (NCBI No. WP_110826218.1) | This study |
| pET28a-H | pET28a vector containing H-protein gene (NCBI No. WP_001295377.1) | Zhang et al. 2020 |
| pET28a-H-E12A | pET28a-H containing H-protein gene with point mutation of E12A | Zhang et al. 2020 |
| pET28a-H-E14A | pET28a-H containing H-protein gene with point mutation of E14A | Zhang et al. 2020 |
| pET28a-H-S67A | pET28a-H containing H-protein gene with point mutation of S67A | Zhang et al. 2020 |
| pET28a-H-D68A | pET28a-H containing H-protein gene with point mutation of D68A | Zhang et al. 2020 |
| pET28a-H-Y70A | pET28a-H containing H-protein gene with point mutation of Y70A | Zhang et al. 2020 |
| pET28a-H-Y70M | pET28a-H containing H-protein gene with Y70 saturated mutagenesis library | This study |
| pET22b-SHMT | pET28a vector containing SHMT gene ((NCBI No. WP_226145048.1) | This study |
| pET28a-LpLSD | pET28a vector containing LSD gene from *Legionella pneumophila* (NCBI No. WP_010946527.1) | This study |
| pET28a-MsLSD | pET28a vector containing LSD gene from *Mycolicibacterium smegmatis* (NCBI No. WP_011729138.1) | This study |

Table 2. Primers used in this study

| Primer | Sequence |
| --- | --- |
| pET28a-P-F | 5’-catgccatgggcacacagacgttaagccagcttgaaaac-3’ |
| pET28a-P-R | 5’-ctgctcctgcgtaccgattagcgaataccagctcgagcgg-3’ |
| pET28a-T-F | 5’-catgccatggcacaacagactcctttgtacgaacaa-3’ |
| pET28a-T-R | 5’-ccgctcgagcgcgacggctttgccgttacgcacaaaaac-3’ |
| pET28a-H-F | 5’-catgccatgggcagcaacgtaccagcagaactgaaatac-3’ |
| pET28a-H-R | 5’-ccgctcgagctcgtcttctaacaatgcttcgtatgc-3’ |
| pET28a-L-F | 5’-gggaattccatatgatgagtactgaaatcaaaactcaggtcg-3’ |
| pET28a-L-R | 5’-ccgctcgagttacttcttcttcgctttcgggttc-3’ |
| pET28a-C335S-F | 5’-gcgaactccaacatttctacttcccaggtactg-3’ |
| pET28a-C335S-R | 5’-aatgttggagttcgctttctcacg-3’ |
| pET28a-C949S-F | 5’-tcctgcgtaccgattagcgaatac-3’ |
| pET28a-C949S-R | 5’-ctaatcggtacgcaggaagagaacaggttacggtc-3’ |
| pET28a-C951S-R | 5’-gtattcgctaatcggtacagaggagcagaacaggttacg-3’ |
| pET28a-C949S, C951S-F | 5’-gtaccgattagcgaataccagctcg-3’ |
| pET28a-C949S, C951S-R | 5’-gtattcgctaatcggtacagaggaagagaacaggttacggtcgcc-3’ |
| pET22b-SHMT-F | 5’-cccaagcttttagtggtggtggtggtggtgtgcgtaaaccgggtaacg-3’ |
| pET22b-SHMT-R | 5’-ggaattccatatgatgttaaagcgtgaaatgaacattgc-3’ |
| pET22b-LSD-F | 5’-ggaattccatatgatgcaccaccaccaccaccacaacattagtgtttttgatttattttctataggaattg-3’ |
| pET22b-LSD-R | 5’-gcaagcttctaacactcaggcaagttaac-3’ |
| pET28a-Y70M-F | 5’-aaagcggcgtcagacattnnkgcgccagtaagcggtgaaat-3’ |
| pET28a-Y70M-R | 5’-aatgtctgacgccgcttttactga-3’ |

Table 3. Reduction potential of some biological redox couples

| Reduction | Standard reduction potential (V) |
| --- | --- |
| b-MEox + 2 H+ + 2 e- b-ME | -0.26 |
| Lipoic acid + 2 H+ + 2 e- dihydrolipoic acid | -0.29 |
| TCEPox + 2 H+ + 2 e- TCEP | -0.32 |
| DTTox + 2 H+ + 2 e- DTT | -0.33 |

Table 4. Thermadynamic characterizations of glycine production pathways1

| Reactions | ΔrGm’(kJ/mol) |
| --- | --- |
| Formate + THF + ATP 10-formyl-THF + ADP | -4.8 |
| 10-formyl-THF 5,10-methenyl-THF | 5.0 |
| 5,10-methenyl-THF + NADPH 5,10-methylene-THF + NADP+ | -9.9 |
| 5,10-methylene-THF + NH4 + CO2 + NADH Glycine + THF + NAD+ | -1.2 |
| Formate + ATP + CoA Formyl-CoA + ADP | -28.2 |
| Formyl-CoA + NADH Formaldehyde + NAD+ | 27.5 |
| Formaldehyde + THF 5,10-methylene-THF + H2O | -21.1 |
| Formate + ATP Formyl-P | -18.0 |
| Formyl-P + CoA Formyl-CoA | -4.2 |
| Formate + NADH Formaldehyde + NAD+ | 54.8 |
| Methanol + NAD+ Formaldehyde + NADH | 45.1 |
| Methanol + O2  Formaldehyde + H2O2 | -100.6 |

1 thermodynamic analysis of ΔrGm’ for individual steps of the pathways under physiological conditions4 (pH 7.5, ionic strength I=0.20, sustrates = 1 mM, ATP = 2 mM, ADP = 2 mM, NADH = 2 mM, NAD+ = 2 mM, CoA = 0.5 mM, THF = 0.5 mM).

Table 5. The synthesized LSD enzymes in this study

MsLSD (*Mycolicibacterium smegmatis*)

MDLVTLDDISGAAARIAADIVRTPLLAADWGDPRCPLWLKAETLQPIGAFKIRGAFNALGRLDTHTRARGVVAYSSGNHAQAVAYAAAAYGVPAHIVMPEETPAVKVEATRRRGAHVVLCGAGERERTAAELVEKTGAVLIPPFDHPDIIAGQGTIGIEIAEDLPELATVLIPVSGGGLASGIGTAIRALRPKAKIFAVEPELAADTAESLALGSIVEWPVAKRNRTIADGLRSTPSELTFAHLRQVIDDVITVSEDEIRSAVRELALRARLVAEPSGAVSLAGYRKAALPDGSAVAIVSGGNIEPAQLAAILAGG

LpLSD (*Legionella pneumophila*)

MNISVFDLFSIGIGPSSSHTVGPMLAANAFLQLLEQKNLFDKTQRVKVELYGSLALTGKGHGTDKAILNGLENKAPETVDPASMIPRMHEILDSNLLNLAGKKEIPFHEATDFLFLQKELLPKHSNGMRFSAFDGNANLLIEQVYYSIGGGFITTEEDFDKSTTDTNPPPYPFATATELLKLCKKHHLTIAELMLVNEKTWRSSAEIHKGILDIAKVMDDCINNGCKHDGVLPGGLNLKRRAPDLYRKLIEQKGVKSVFEQSDIMNHLNLYAMAVNEENAAGGRIVTAPTNGAAGIIPAVLKYCQQAHDRMSNEDIYTYFLTAAAIGILYKKGASISGAEVGCQGEVGVASSMAAAGLTAVLGGTIEQVENAAEIAMEHHLGMTCDPVLGLVQIPCIERNAMGAVKAVNATRMALIGDGQHQISLDKVIKTMKQTGMDMQSIYKETSMGGLAVNLPEC

**References**

1. Bordoli, L. *et al.* Protein structure homology modeling using SWISS-MODEL workspace. *Nat Protoc* **4**, 1–13 (2009).

2. Jumper, J. *et al.* Highly accurate protein structure prediction with AlphaFold. *Nature* **596**, 583–589 (2021).

3. Jurrus, E. *et al.* Improvements to the APBS biomolecular solvation software suite. *Protein Sci* **27**, 112–128 (2018).

4. Beber, M. *et al*. eQuilibrator 3.0: a database solution for thermodynamic constant estimation *Nucleic Acids Res*., 50, D603–D609 (2022).
